# Supplementary material for: Efficient acylation of gastrodin byAspergillus oryzaewhole-cells in non-aqueous media
Source: Royal Society of Chemistry journal article supplement (doi:10.1039/c9ra01605h), 2019-01-01
Supplement: c9ra01605h1.pdf [file c9ra01605h1.pdf]

The supplementary materials

**Figure 1S.** The HPLC chromatograms of samples before (a) and after (b) acylation of gastrodin catalyzed by *Aspergillus oryzae* (the peak 1 is gastrodin, the peak 2 is gastrodin mono-propionate, peak 3 is gastrodin di-propionate)

**Figure 2S.** The  $^{13}\text{C}$  NMR spectra of gastrodin mono-propionate (a) and gastrodin di-propionate (b).

**Figure 3S.** The time course of acylation of gastrodin catalyzed by *Aspergillus oryzae* whole-cells.

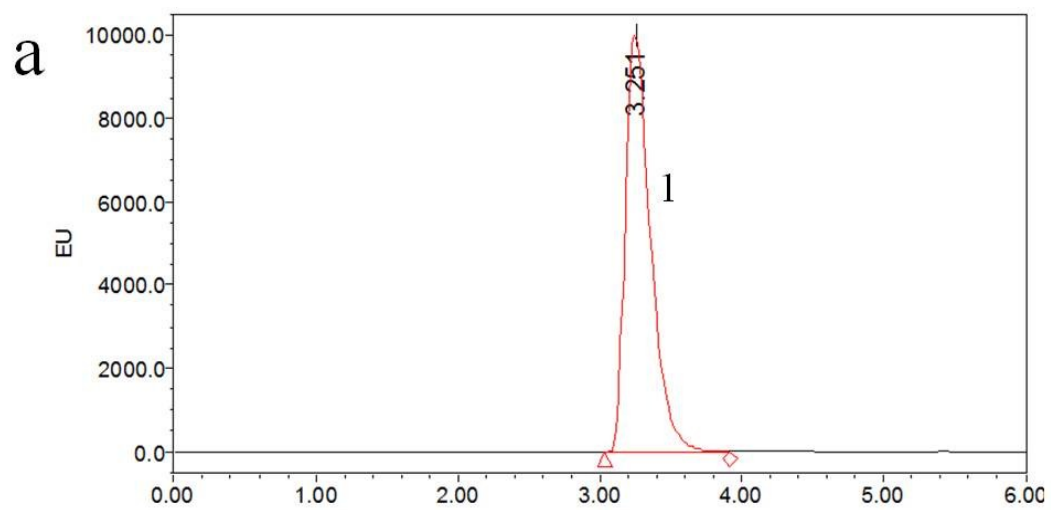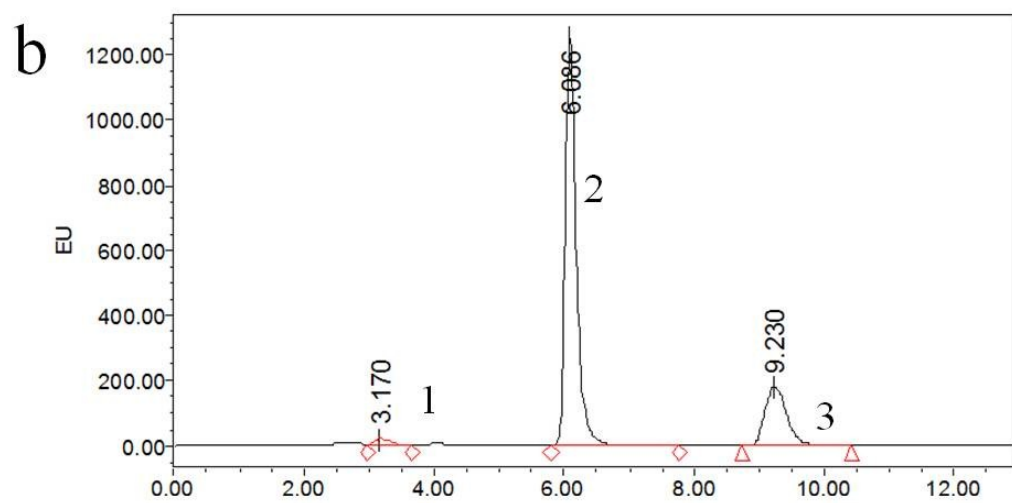

Figure 1

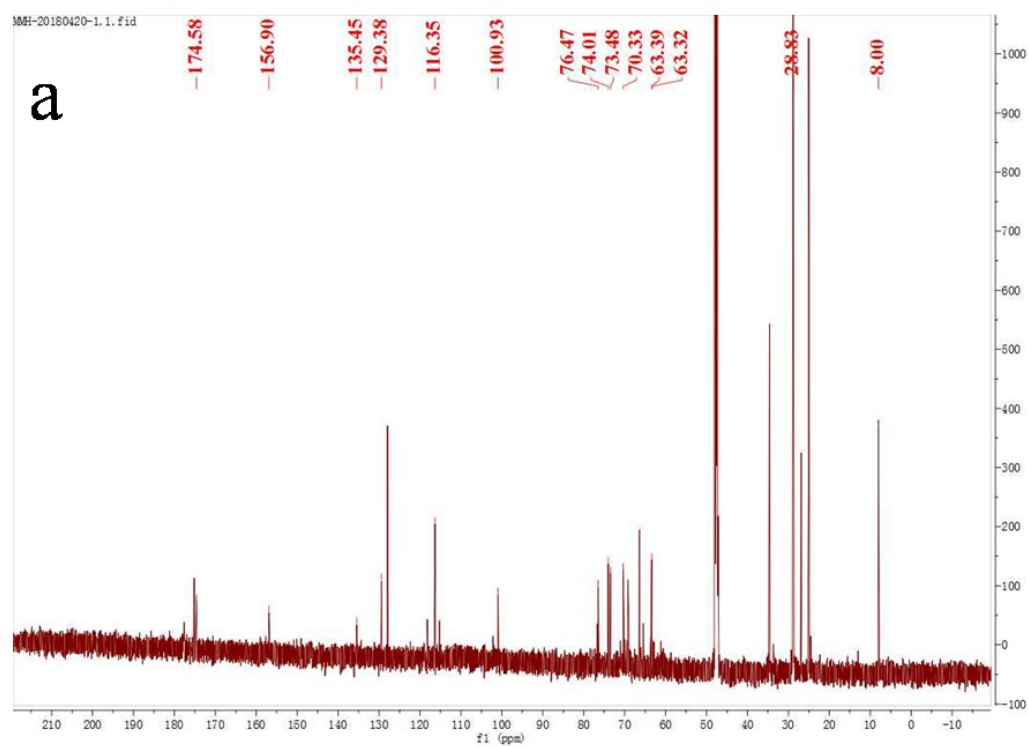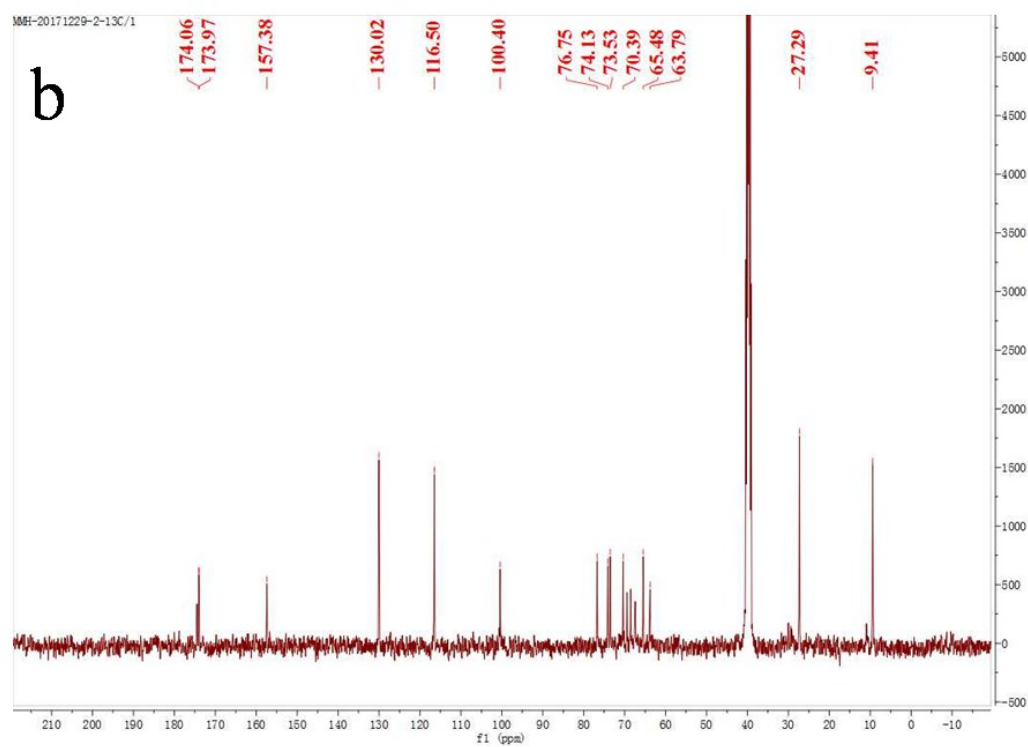

Figure 2

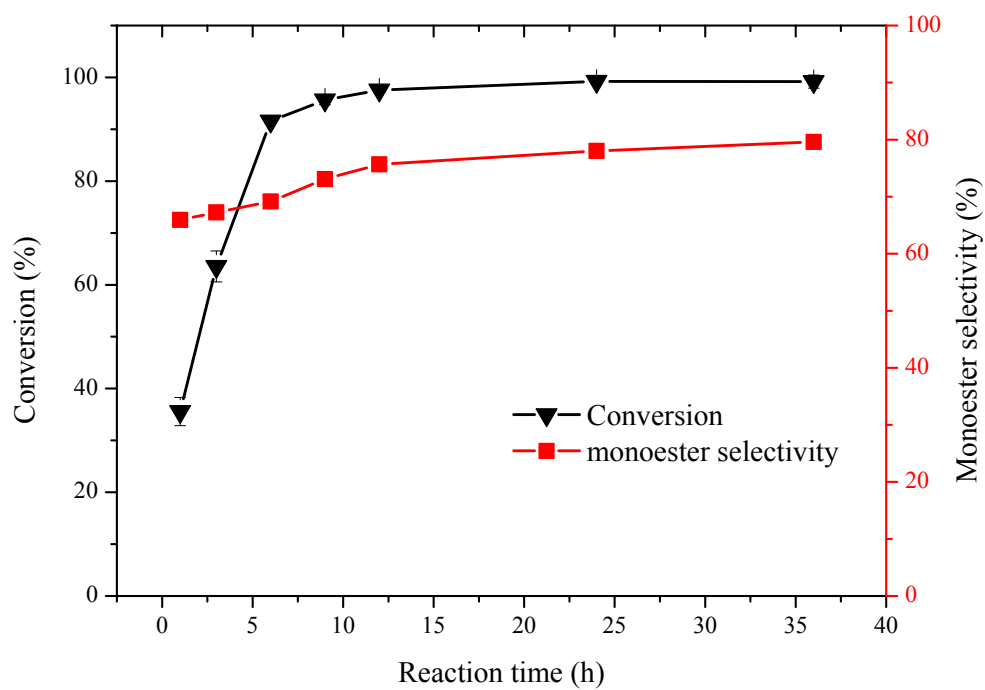

Figure 3
